# Supplementary material for: Decoupling of urban CO 2 and air pollutant emission reductions during the European SARS-CoV-2 lockdown
Source: Copernicus journal article supplement (doi:10.5194/acp-21-3091-2021), 2021-03-02
Supplement: Supplementary file 1 [file acp-21-3091-2021-supplement.pdf]

Supplement of Atmos. Chem. Phys., 21, 3091–3102, 2021  
<https://doi.org/10.5194/acp-21-3091-2021-supplement>  
© Author(s) 2021. This work is distributed under  
the Creative Commons Attribution 4.0 License.

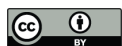

*Supplement of*

## **Decoupling of urban CO<sub>2</sub> and air pollutant emission reductions during the European SARS-CoV-2 lockdown**

**Christian Lamprecht et al.**

*Correspondence to:* Thomas Karl ([thomas.karl@uibk.ac.at](mailto:thomas.karl@uibk.ac.at))

The copyright of individual parts of the supplement might differ from the CC BY 4.0 License.

1  
2  
3  
4  
5  
6  
7  
8  
9  
10

## Supplementary Information:

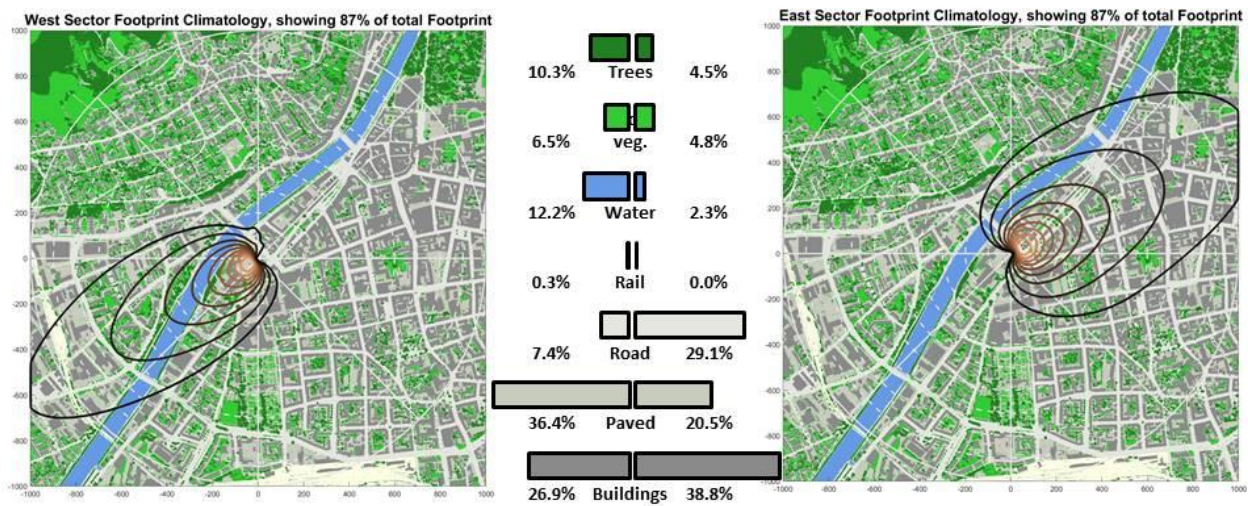11  
12  
13  
14

**Fig. S1:** Sectoral analysis of the IAO footprint. (data source: © OpenStreetMap contributors 2020. Distributed under a Creative Commons BY-SA License)

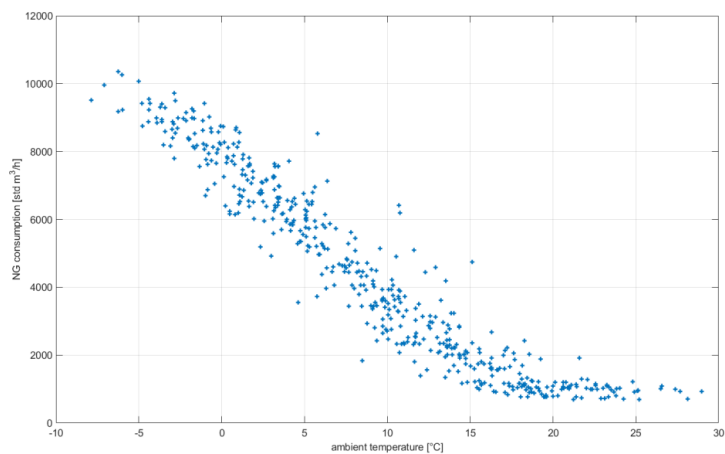15  
16  
17  
18

**Fig. S2:** Degree heating days vs natural gas consumption from 01/01/2019 to 01/05/2020 (data source: TIGAS, Tirol, [www.tigas.at](http://www.tigas.at))

19 **Boosted regression tree model:**

20 Three methods are used to validate the regression model. The first approach (method 1: pre-  
 21 lockdown) is based on long-term measurements of NO<sub>2</sub>/NO, NO<sub>x</sub>, CO<sub>2</sub> and traffic data, where the  
 22 model is trained up to Feb. 29<sup>th</sup> 2020, and the prediction is then tested for the first two weeks in  
 23 March 2020 before SARS-CoV2 lockdown measures were implemented. The second approach  
 24 (method 2: bootstrapping) includes all chemical species. Here, the regression model is trained  
 25 with 2019 data, when an air quality campaign was conducted during a similar timeframe (March-  
 26 April 2019) as the SARS-CoV2 lock-down period in 2020. The regression model is then tested  
 27 using bootstrapping based on 1000 randomized samples. The third approach (method 3: cross  
 28 validation) is a variation where the model is trained on a subset of the 2019 period (March-April  
 29 2019), and tested against data that were not used to train the model. Table S1 summarizes  
 30 respective model verification and initiation dates. Table S2 captures statistical parameters of the  
 31 model output verification. Importance values of individual predictors of the regression model for  
 32 key chemical species are shown in Fig. S3. The most important predictors are wind direction,  
 33 time of day, radiation and temperature.

34

35 **Table S1:** Regression model setup

| Species                           | Model training       | Model verification   | Model run initiated |
|-----------------------------------|----------------------|----------------------|---------------------|
| NO <sub>x</sub> , CO <sub>2</sub> | 1.9.2018 – 29.2.2020 | 1.3.2020-13.3.2020   | 13/3/2020           |
| NO <sub>x</sub> , CO <sub>2</sub> | 11.3.2019 – 9.4.2019 | 11.3.2019 – 9.4.2019 | 13/3/2020           |
| NM VOC                            | 11.3.2019 – 9.4.2019 | 11.3.2019 – 9.4.2019 | 13/3/2020           |
| Traffic                           | 1.9.2018 – 29.2.2020 | 1.3.2020-13.3.2020   | 13/3/2020           |

36

37 **Uncertainty Analysis:**

38

39 **Regression model:**

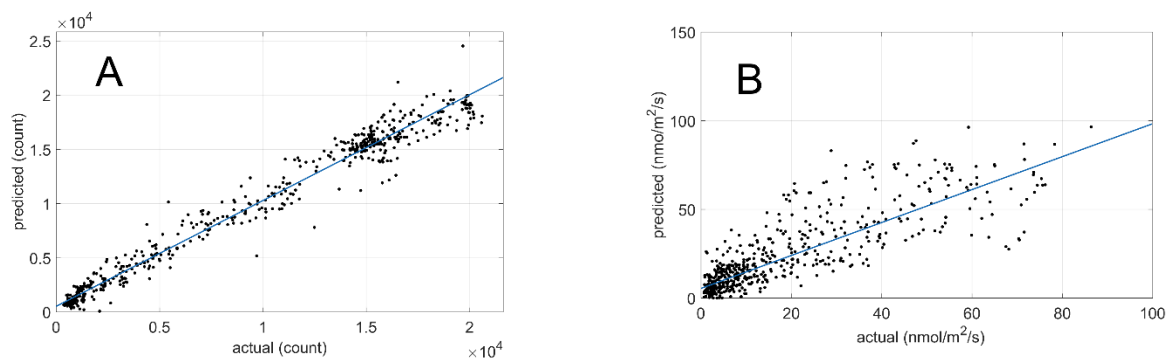

40

41 **Fig. S3:** (A) Regression model prediction for traffic during pre-lockdown (method 1). (B)  
 42 Regression model prediction for NO<sub>x</sub> during pre-lockdown. The regression slopes are represented  
 43 by the blue lines and are used to calculate the average bias of the fit (see Table S2)

44

45

46

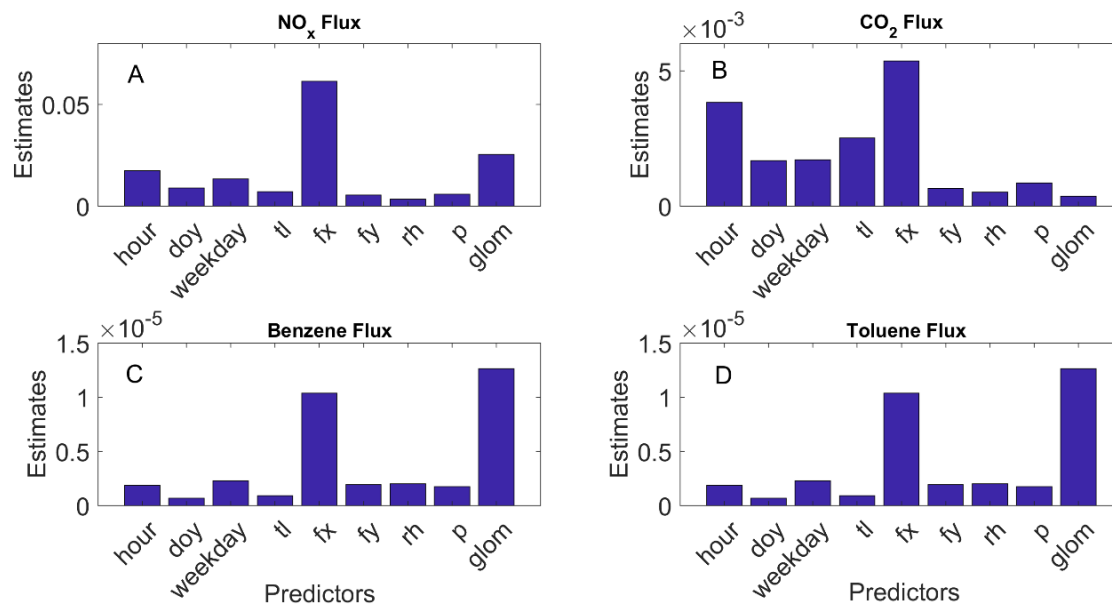

47  
48 **Fig. S4:** Importance of individual predictors from the boosted regression tree model. (A) NO<sub>x</sub>  
49 flux, (B) CO<sub>2</sub> flux, (C) benzene flux, and (D) toluene flux. Predictors are hour of the day (hour),  
50 day of year (doy), day of the week (weekday), ambient temperature (tl), longitudinal wind speed  
51 (fx), latitudinal windspeed (fy), relative humidity (rh), pressure (p), and global radiation (glom).

52  
53 **Table S2:** Statistical results (bias, standard error and R<sup>2</sup>) of the model verification methods for  
54 individual quantities.

| Species | Bias | SE    | R2   | Verification method |
|---------|------|-------|------|---------------------|
| NOx     | -7%  | 0.04  | 0.80 | Pre-lockdown        |
| CO2     | -25% | 0.05  | 0.62 | Pre-lockdown        |
| traffic | -2%  | 0.01  | 0.97 | Pre-lockdown        |
| NOx     | -2%  | 0.03  | 0.79 | Bootstrapping       |
| CO2     | -1%  | 0.03  | 0.75 | Bootstrapping       |
| traffic | -1%  | 0.001 | 0.97 | Bootstrapping       |
| NOx     | -6%  | 0.02  | 0.93 | Cross-validation    |
| CO2     | -6%  | 0.01  | 0.86 | Cross-validation    |
| traffic | -1%  | 0.004 | 0.99 | Cross-validation    |
| Benzene | -1%  | 0.01  | 0.86 | Bootstrapping       |
| Toluene | -1%  | 0.01  | 0.83 | Bootstrapping       |
| Benzene | -13% | 0.03  | 0.87 | Cross-validation    |
| Toluene | -21% | 0.02  | 0.92 | Cross-validation    |

55

56

### 57 **Two end member pollutant model – uncertainty estimation:**

58 Errors for coefficients  $a_s$  and  $b_s$  (eq 4.) can be calculated based on error propagation, where by

59 definition  $\Delta a_s = \Delta b_s$ . Lets define  $b_s := b$ ,  $\frac{\delta T}{T} := t$ ,  $\frac{\delta R}{R} := r$ , and  $\frac{\delta F}{F} := f$ , then

60 
$$\Delta b = \frac{\partial b}{\partial f} \Delta f + \frac{\partial b}{\partial t} \Delta t + \frac{\partial b}{\partial r} \Delta r$$
, and  $b = \frac{f-t}{r-t}$  (Seq. 2a, b)

61 Uncertainties of relative flux, traffic and RCP activity variations are taken as  $\Delta f = 7\%$ ,  $\Delta t = 2\%$ ,  
62 and  $\Delta r = 50\%$ . This leads to a combined uncertainty of  $\Delta a = \Delta b = 0.11$ .  $\Delta f$  represents the average  
63 bias obtained from the boosted tree regression model verification analysis.  $\Delta t$  is based on  
64 counting statistics of traffic observations.  $\Delta r$  is the least certain and estimated based on the  
65 constraints estimated for the RCP sector.  
66
